# Supplementary material
Source: PubMed Central journal article supplement (PMC10230129)

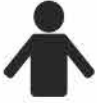

# Human Questionnaire Form

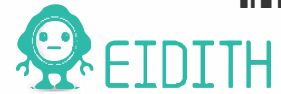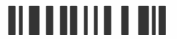

## Directions for completing the questionnaire

All questions are required unless otherwise indicated.

## Directions for selecting modules for the interview

1. Select module(s) for site characterization
2. Add the Temporary Settlement Module if respondent dwelling is NOT permanent (Question 15)
3. Add all modules for work activities chosen in question 24 (Question 24)
4. Add Hunter Module if hunter/trapper/fisher is selected in Question 24 or "yes" to Question 52 "Since this time last year...".

Livelihood Module Table (based on response to Question 24)

Complete the module that corresponds with the livelihood chosen as follows:

|                                                                     |                                               |
|---------------------------------------------------------------------|-----------------------------------------------|
| extraction of minerals, gas, oil, timber                            | extractive industry module                    |
| crop production                                                     | crop production module                        |
| wildlife restaurant business                                        | wildlife restaurant module                    |
| wild/exotic animal trade business                                   | market and value chain module                 |
| rancher/farmer animal production business                           | animal production module                      |
| meat processing, slaughterhouse, abattoir                           | animal production module                      |
| zoo/sanctuary animal health care                                    | zoos & sanctuaries module                     |
| hunter/trapper/fisher                                               | hunter module                                 |
| nurse, doctor, traditional healer, community health worker          | hospital or clinic health professional module |
| If 'other' livelihood is livestock animal or product trade business | market and value chain module                 |

If no additional modules are selected, the interview is complete.

## Human Questionnaire Form ID Instructions

Enter the Site and Event Form ID barcode number to the grid located at the top of page 1 of the Human Questionnaire Form.

Enter the Human Questionnaire Form ID barcode number to grid located at the top of each associated module.

The barcode is located at the bottom right hand corner of each page of the Human Questionnaire section and the Site and Event Characterization Form.

Use the number after the dash (-) and fill the grid with the numbers from top to bottom.

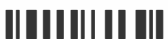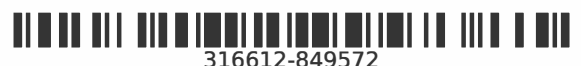

316612-849572

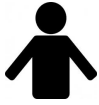

# Human Questionnaire Form

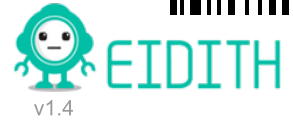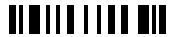

Add Site and Event Form ID:

|   |   |   |   |   |   |   |   |   |   |
|---|---|---|---|---|---|---|---|---|---|
| 0 | 1 | 2 | 3 | 4 | 5 | 6 | 7 | 8 | 9 |
| 0 | 1 | 2 | 3 | 4 | 5 | 6 | 7 | 8 | 9 |
| 0 | 1 | 2 | 3 | 4 | 5 | 6 | 7 | 8 | 9 |
| 0 | 1 | 2 | 3 | 4 | 5 | 6 | 7 | 8 | 9 |
| 0 | 1 | 2 | 3 | 4 | 5 | 6 | 7 | 8 | 9 |

Site name and date:

\_\_\_\_\_  
(For reference only)

1. Consent Form Administered & Signed  yes  no

Participant ID: \_\_\_\_\_

2. (Question removed)

3. Date of interview \_\_\_\_\_

4. Begin time of interview \_\_\_\_\_  
(Example: 17:50)

5. End time of interview \_\_\_\_\_  
(Example: 19:20)

6. Where are you conducting this interview?

Village/Town/City \_\_\_\_\_ Province/State \_\_\_\_\_

Latitude \_\_\_\_\_ Longitude \_\_\_\_\_

Interviewer: Please collect GPS coordinates if administering using paper and pen.

7. Interviewer Observed Gender  male  female  other

## INTERVIEW/QUESTIONNAIRE BEGINS

### Demographics Section

8. How old are you? \_\_\_\_\_  
If the exact age is unknown, enter the respondent's estimated age.

9. Where do you live?

Village/Town/City \_\_\_\_\_ Province/State \_\_\_\_\_

Latitude \_\_\_\_\_ Longitude \_\_\_\_\_

Interviewer: Probe for landmarks or nearest known site if area unknown.  
GPS coordinates to be identified and entered after completion of interview.

10. How long have you lived there?  <1 month  1 month - 1 year  >1 - 5 years  >5 - 10 years  >10 years  
Select one option.

11. How many other people live in the dwelling where you live? \_\_\_\_\_ Skip to question 14 if answer is 0.  
(Not including participant)

12. How many in the dwelling are children less than 5 years old? \_\_\_\_\_  
(Not including participant)

13. How many in the dwelling are male? \_\_\_\_\_  
(Not including participant)

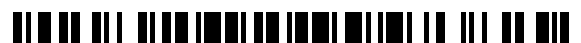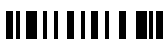

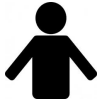

# Human Questionnaire Form

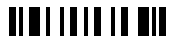

Participant ID \_\_\_\_\_

(For reference only)

14. How many rooms are there in the dwelling where you live? \_\_\_\_\_  
(Do not include bathroom or kitchen)

15. Is the dwelling a permanent structure (that cannot be moved)?  yes  
Interviewer: If answer is no, complete temporary settlement questionnaire.  no

16. Do you get water from:  piped in water/water taps  
Select all that apply.  covered well  
 uncovered well/pond/river  
 water truck/rainwater harvest  
 other: \_\_\_\_\_

17. Do you treat your drinking water?  yes  
 no

18. If yes, how do you treat your water?  boil  
Select all that apply.  filter  
 add chlorine or bleach  
 solar disinfection  
 other: \_\_\_\_\_

19. Is your source for drinking water ever used by animals?  yes  
 no

20. In your dwelling is there a dedicated location for human solid waste/excreta?  yes  
(Example: toilet, latrine, designated area)  no

21. Do you have containers for storing food for the household?  yes, with covers  
Select all that apply.  yes, without covers  
 no

## Livelihood Section

In this section, I'd like to ask you about education and the kinds of work activities that you have done since this time last year.

22. What is the highest level of education you have completed?  primary school  
Select one option.  secondary school  
 college/university/professional  
 none

23. What is the highest level of education that your mother completed?  primary school  
Select one option. (Skip for Cameroon.)  secondary school  
 college/university/professional  
 none

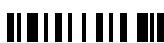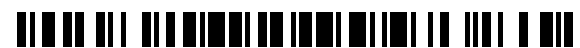

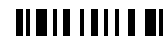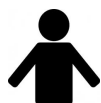

# Human Questionnaire Form

Participant ID \_\_\_\_\_

## Livelihood Section

(For reference only)

24. Since this time last year what are the activities you have done to earn your livelihood?

Select all that apply

- extraction of minerals, gas, oil timber (**extractive industry module**)
  - crop production (**crop production module**)
  - wildlife restaurant business (**wildlife restaurant module**)
  - wild/exotic animal trade/market business (**market and value chain module**)
  - rancher/farmer animal production business (**animal production module**)
  - meat processing, slaughterhouse, abattoir (**animal production module**)
  - zoo/sanctuary animal health care (**zoos & sanctuaries module**)
  - protected area worker
  - hunter/trapper/fisher (**hunter module**)
  - forager/gatherer/non-timber forest product collector
  - migrant laborer
  - nurse, doctor, traditional healer, community health worker (**hospital or clinic health professional module**)
  - construction
  - other: \_\_\_\_\_
- If 'other' livelihood is livestock animal or product trade business (**market and value chain module**)

25. If more than one activity was selected, what is the activity on which you spend the most time since this time last year? Select one option.

- extraction of minerals, gas, oil timber
- crop production
- wildlife restaurant business
- wild/exotic animal trade/market business
- rancher/farmer animal production business
- meat processing, slaughterhouse, abattoir
- zoo/sanctuary animal health care
- protected area worker
- hunter/trapper/fisher
- forager/gatherer/non-timber forest product collector
- migrant laborer
- nurse, doctor, traditional healer, community health worker
- construction
- other: \_\_\_\_\_

26. Which best describes your job position?

Select one option.

- manager/owner/foreman
- worker
- live and work at home independently (If chosen, skip to question 28)
- professional
- other: \_\_\_\_\_

27. Where do you work?

Village/Town/City \_\_\_\_\_ Province/State \_\_\_\_\_

Latitude \_\_\_\_\_ Longitude \_\_\_\_\_

Interviewer: Probe for landmarks or nearest known site if area unknown.  
GPS coordinates to be identified and entered after completion of interview.

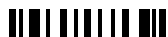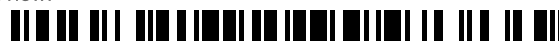

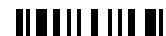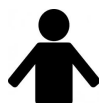

# Human Questionnaire Form

Participant ID \_\_\_\_\_

## Medical History Section

(For reference only)

In this section, I'm going to ask you about any illness or sickness that is not known or recognized in the community, including by medical or treatment providers.

28. Where do you usually get treatment for medical problems? Select all that apply.

- clinic/health center
- hospital
- mobile clinic
- community health worker
- traditional healer
- dispensary or pharmacy

29. Have you ever had an unusual illness with any of the following symptoms:

Select all that apply. (READ ONLY SYMPTOMS)

- fever with headache and severe fatigue or weakness (encephalitis)
- fever with bleeding or bruising not related to injury (hemorrhagic fever)
- fever with cough and shortness of breath or difficulty breathing (SARI)
- fever with muscle aches, cough, or sore throat (ILI)
- fever with diarrhea or vomiting
- fever with rash
- persistent rash or sores on skin
- no (Skip to question 33)
- yes but, none of these symptoms-describe: \_\_\_\_\_

30. Since this time last year, have you had any of these symptoms?

- yes
- no (Skip to question 33)

31. If yes, which ones? Select all that apply.

- fever with headache and severe fatigue or weakness (encephalitis)
- fever with bleeding or bruising not related to injury (hemorrhagic fever)
- fever with cough and shortness of breath or difficulty breathing (SARI)
- fever with muscle aches, cough, or sore throat (ILI)
- fever with diarrhea or vomiting
- fever with rash
- persistent rash or sores on skin
- yes but, none of these symptoms-describe: \_\_\_\_\_

32. In your opinion, when you were sick, what caused this sickness? Select all that apply.

- contact with sick people
- contact with wild animals
- contact with other animals
- bad food or water
- bad spirits/witchcraft
- wound or injury
- I don't know
- other: \_\_\_\_\_

33. Since this time last year, have any of the people you lived with had any of these symptoms?

- yes
- no (Skip to question 36)

34. If yes, which ones? Select all that apply.

- fever with headache and severe fatigue or weakness (encephalitis)
- fever with bleeding or bruising not related to injury (hemorrhagic fever)
- fever with cough and shortness of breath or difficulty breathing (SARI)
- fever with muscle aches, cough, or sore throat (ILI)
- fever with diarrhea or vomiting
- fever with rash
- persistent rash or sores on skin
- yes but, none of these symptoms-describe: \_\_\_\_\_

35. Since this time last year, did anyone you lived with die from this illness?

- yes
- no

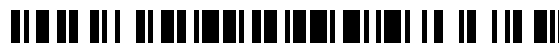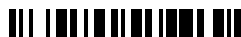

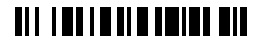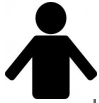

# Human Questionnaire Form

Participant ID \_\_\_\_\_

## Movement Section

(For reference only)

In this section, I'm going to ask you about any travel you have done since this time last year.

36. Have you traveled since this time last year?  yes  
If answer is no, skip to the next section.  no

37. Where have you traveled since this time last year? Anywhere else?

Provide details, such as name of town, nearest (or most frequent) well known place if unknown by interviewer (to be linked to GPS coordinates later)  
Collect up to 6 locations.

Interviewer: Probe for landmarks or nearest known site if area unknown. GPS coordinates to be identified and entered after completion of interview.

Village/Town/City \_\_\_\_\_ Province/State \_\_\_\_\_ Country \_\_\_\_\_

Latitude \_\_\_\_\_ Longitude \_\_\_\_\_

Notes: \_\_\_\_\_

Village/Town/City \_\_\_\_\_ Province/State \_\_\_\_\_ Country \_\_\_\_\_

Latitude \_\_\_\_\_ Longitude \_\_\_\_\_

Notes: \_\_\_\_\_

Village/Town/City \_\_\_\_\_ Province/State \_\_\_\_\_ Country \_\_\_\_\_

Latitude \_\_\_\_\_ Longitude \_\_\_\_\_

Notes: \_\_\_\_\_

Village/Town/City \_\_\_\_\_ Province/State \_\_\_\_\_ Country \_\_\_\_\_

Latitude \_\_\_\_\_ Longitude \_\_\_\_\_

Notes: \_\_\_\_\_

Village/Town/City \_\_\_\_\_ Province/State \_\_\_\_\_ Country \_\_\_\_\_

Latitude \_\_\_\_\_ Longitude \_\_\_\_\_

Notes: \_\_\_\_\_

Village/Town/City \_\_\_\_\_ Province/State \_\_\_\_\_ Country \_\_\_\_\_

Latitude \_\_\_\_\_ Longitude \_\_\_\_\_

Notes: \_\_\_\_\_

If there are more than six locations check here.   
Do not collect additional location information.

38. Why have you traveled?  work  
Select all that apply.  visit family  
 moved  
 religious reasons  
 holiday/vacation  
 go to hospital/seek medical care  
 go to market  
 other: \_\_\_\_\_

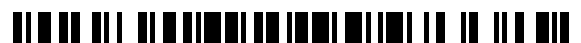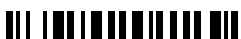

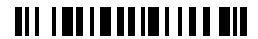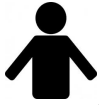

# Human Questionnaire Form

## Animal Contact Section

Participant ID \_\_\_\_\_

(For reference only)

In this section, I'm going to ask you about the animals in your life.

If answered "no" under the "In your lifetime" column, then no answer is required under the "Since this time last year" column.

|                                                                                                                                   | In your lifetime...                                                                       | Since this time last year...                                                              |
|-----------------------------------------------------------------------------------------------------------------------------------|-------------------------------------------------------------------------------------------|-------------------------------------------------------------------------------------------|
| 39. Has an animal lived as a pet in or near your dwelling?                                                                        | <input type="radio"/> yes<br><input type="radio"/> no                                     | <input type="radio"/> yes<br><input type="radio"/> no                                     |
| 40. Have you handled live animals?                                                                                                | <input type="radio"/> yes<br><input type="radio"/> no                                     | <input type="radio"/> yes<br><input type="radio"/> no                                     |
| 41. Have you raised live animals?                                                                                                 | <input type="radio"/> yes<br><input type="radio"/> no                                     | <input type="radio"/> yes<br><input type="radio"/> no                                     |
| 42. Have you shared a water source with animals for washing?                                                                      | <input type="radio"/> yes<br><input type="radio"/> no<br><input type="radio"/> don't know | <input type="radio"/> yes<br><input type="radio"/> no<br><input type="radio"/> don't know |
| 43. Have you seen animal feces in or near food before you have eaten it?                                                          | <input type="radio"/> yes<br><input type="radio"/> no                                     | <input type="radio"/> yes<br><input type="radio"/> no                                     |
| 44. Have you eaten food after an animal has touched or damaged it? (Example: chew marks or scratches)                             | <input type="radio"/> yes<br><input type="radio"/> no<br><input type="radio"/> don't know | <input type="radio"/> yes<br><input type="radio"/> no<br><input type="radio"/> don't know |
| 45. Do any animals come inside the dwelling where you live?                                                                       | <input type="radio"/> yes<br><input type="radio"/> no                                     | <input type="radio"/> yes<br><input type="radio"/> no                                     |
| 46. Have you cooked or handled meat, organs or blood from a recently killed animal?                                               | <input type="radio"/> yes<br><input type="radio"/> no                                     | <input type="radio"/> yes<br><input type="radio"/> no                                     |
| 47. Have you eaten raw or undercooked meat or organs or blood?                                                                    | <input type="radio"/> yes<br><input type="radio"/> no                                     | <input type="radio"/> yes<br><input type="radio"/> no                                     |
| 48. Have you eaten an animal that you knew was not well/sick?                                                                     | <input type="radio"/> yes<br><input type="radio"/> no<br><input type="radio"/> don't know | <input type="radio"/> yes<br><input type="radio"/> no<br><input type="radio"/> don't know |
| 49. Have you found a dead animal and collected it to eat or share?                                                                | <input type="radio"/> yes<br><input type="radio"/> no                                     | <input type="radio"/> yes<br><input type="radio"/> no                                     |
| 50. Have you found a dead animal and collected it to sell it?                                                                     | <input type="radio"/> yes<br><input type="radio"/> no                                     | <input type="radio"/> yes<br><input type="radio"/> no                                     |
| 51. Have you been scratched or bitten by an animal?                                                                               | <input type="radio"/> yes<br><input type="radio"/> no                                     | <input type="radio"/> yes<br><input type="radio"/> no                                     |
| 52. Have you hunted or trapped an animal?<br>(If answered "yes" to "Since this time last year" also administer the hunter module) | <input type="radio"/> yes<br><input type="radio"/> no                                     | <input type="radio"/> yes<br><input type="radio"/> no                                     |
| 53. Have you slaughtered an animal?                                                                                               | <input type="radio"/> yes<br><input type="radio"/> no                                     | <input type="radio"/> yes<br><input type="radio"/> no                                     |

example only do not use in field

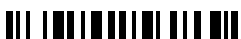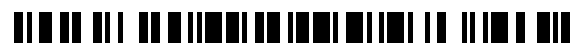

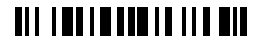

# Human Questionnaire Form

Participant ID \_\_\_\_\_

## Animal Contact Section

(For reference only)

54. The last time you were scratched or bitten, or cut yourself while butchering or slaughtering, what did you do?  
Select all that apply.

- let someone else take over
- wash wound with soap and water
- rinse wound with water
- bandage wound
- visit doctor
- nothing - kept working
- never butcher or slaughter
- n/a

55. Are there any risks associated with slaughtering or butchering when you have an open wound?

Interviewer: Do not read responses.

- no
- yes, but I don't know what they are
- yes, it can make you sick
- yes, it can poison you
- yes, it can infect you with a disease
- don't know
- other: \_\_\_\_\_

56. Interviewer: Circle all headings where "yes" was answered in the "Since this time last year" questions above.

Then ask which animals/mammals for each "yes" category.

Select all that apply.

|                    | pet<br>(39)              | handled<br>(40)          | raised<br>(41)           | feces in<br>or near<br>food<br>(43) | in house<br>(45)         | cooked/<br>handled<br>(46) | eaten<br>raw/<br>under<br>cooked<br>(47) | eaten<br>sick<br>(48)    | found<br>dead<br>(49/50) | scratched/<br>bitten<br>(51) | hunted/<br>trapped<br>(52) | slaugh-<br>tered<br>(53) |
|--------------------|--------------------------|--------------------------|--------------------------|-------------------------------------|--------------------------|----------------------------|------------------------------------------|--------------------------|--------------------------|------------------------------|----------------------------|--------------------------|
| rodents/shrews     | <input type="checkbox"/> | <input type="checkbox"/> | <input type="checkbox"/> | <input type="checkbox"/>            | <input type="checkbox"/> | <input type="checkbox"/>   | <input type="checkbox"/>                 | <input type="checkbox"/> | <input type="checkbox"/> | <input type="checkbox"/>     | <input type="checkbox"/>   | <input type="checkbox"/> |
| bats               | <input type="checkbox"/> | <input type="checkbox"/> | <input type="checkbox"/> | <input type="checkbox"/>            | <input type="checkbox"/> | <input type="checkbox"/>   | <input type="checkbox"/>                 | <input type="checkbox"/> | <input type="checkbox"/> | <input type="checkbox"/>     | <input type="checkbox"/>   | <input type="checkbox"/> |
| non-human primates | <input type="checkbox"/> | <input type="checkbox"/> | <input type="checkbox"/> | <input type="checkbox"/>            | <input type="checkbox"/> | <input type="checkbox"/>   | <input type="checkbox"/>                 | <input type="checkbox"/> | <input type="checkbox"/> | <input type="checkbox"/>     | <input type="checkbox"/>   | <input type="checkbox"/> |
| birds              | <input type="checkbox"/> | <input type="checkbox"/> | <input type="checkbox"/> | <input type="checkbox"/>            | <input type="checkbox"/> | <input type="checkbox"/>   | <input type="checkbox"/>                 | <input type="checkbox"/> | <input type="checkbox"/> | <input type="checkbox"/>     | <input type="checkbox"/>   | <input type="checkbox"/> |
| carnivores         | <input type="checkbox"/> | <input type="checkbox"/> | <input type="checkbox"/> | <input type="checkbox"/>            | <input type="checkbox"/> | <input type="checkbox"/>   | <input type="checkbox"/>                 | <input type="checkbox"/> | <input type="checkbox"/> | <input type="checkbox"/>     | <input type="checkbox"/>   | <input type="checkbox"/> |
| ungulates          | <input type="checkbox"/> | <input type="checkbox"/> | <input type="checkbox"/> | <input type="checkbox"/>            | <input type="checkbox"/> | <input type="checkbox"/>   | <input type="checkbox"/>                 | <input type="checkbox"/> | <input type="checkbox"/> | <input type="checkbox"/>     | <input type="checkbox"/>   | <input type="checkbox"/> |
| pangolins          | <input type="checkbox"/> | <input type="checkbox"/> | <input type="checkbox"/> | <input type="checkbox"/>            | <input type="checkbox"/> | <input type="checkbox"/>   | <input type="checkbox"/>                 | <input type="checkbox"/> | <input type="checkbox"/> | <input type="checkbox"/>     | <input type="checkbox"/>   | <input type="checkbox"/> |
| poultry/other fowl | <input type="checkbox"/> | <input type="checkbox"/> | <input type="checkbox"/> | <input type="checkbox"/>            | <input type="checkbox"/> | <input type="checkbox"/>   | <input type="checkbox"/>                 | <input type="checkbox"/> | <input type="checkbox"/> | <input type="checkbox"/>     | <input type="checkbox"/>   | <input type="checkbox"/> |
| goats/sheep        | <input type="checkbox"/> | <input type="checkbox"/> | <input type="checkbox"/> | <input type="checkbox"/>            | <input type="checkbox"/> | <input type="checkbox"/>   | <input type="checkbox"/>                 | <input type="checkbox"/> | <input type="checkbox"/> | <input type="checkbox"/>     | <input type="checkbox"/>   | <input type="checkbox"/> |
| camels             | <input type="checkbox"/> | <input type="checkbox"/> | <input type="checkbox"/> | <input type="checkbox"/>            | <input type="checkbox"/> | <input type="checkbox"/>   | <input type="checkbox"/>                 | <input type="checkbox"/> | <input type="checkbox"/> | <input type="checkbox"/>     | <input type="checkbox"/>   | <input type="checkbox"/> |
| swine              | <input type="checkbox"/> | <input type="checkbox"/> | <input type="checkbox"/> | <input type="checkbox"/>            | <input type="checkbox"/> | <input type="checkbox"/>   | <input type="checkbox"/>                 | <input type="checkbox"/> | <input type="checkbox"/> | <input type="checkbox"/>     | <input type="checkbox"/>   | <input type="checkbox"/> |
| cattle/buffalo     | <input type="checkbox"/> | <input type="checkbox"/> | <input type="checkbox"/> | <input type="checkbox"/>            | <input type="checkbox"/> | <input type="checkbox"/>   | <input type="checkbox"/>                 | <input type="checkbox"/> | <input type="checkbox"/> | <input type="checkbox"/>     | <input type="checkbox"/>   | <input type="checkbox"/> |
| dogs               | <input type="checkbox"/> | <input type="checkbox"/> | <input type="checkbox"/> | <input type="checkbox"/>            | <input type="checkbox"/> | <input type="checkbox"/>   | <input type="checkbox"/>                 | <input type="checkbox"/> | <input type="checkbox"/> | <input type="checkbox"/>     | <input type="checkbox"/>   | <input type="checkbox"/> |
| cats               | <input type="checkbox"/> | <input type="checkbox"/> | <input type="checkbox"/> | <input type="checkbox"/>            | <input type="checkbox"/> | <input type="checkbox"/>   | <input type="checkbox"/>                 | <input type="checkbox"/> | <input type="checkbox"/> | <input type="checkbox"/>     | <input type="checkbox"/>   | <input type="checkbox"/> |

57. Are you worried about diseases or disease outbreaks in live animals in your local market?

- yes
- no

END OF MAIN QUESTIONNAIRE

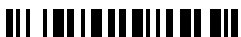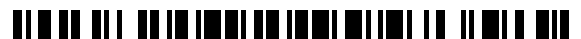

Supplement: 10393_2023_1636_MOESM1_ESM.pdf [file 10393_2023_1636_MOESM1_ESM.pdf]
